# Supplementary material for: Growth modulation of bent micro crystals to single crystals in a one-dimensional coordination framework
Source: Royal Society of Chemistry journal article supplement (doi:10.1039/c5ra14510d), 2015-01-01
Supplement: c5ra14510d1.pdf [file c5ra14510d1.pdf]

## Growth modulation of bent micro crystals to single crystals in a one-dimensional coordination framework

Ravi Shankar<sup>\*,a</sup>, Meenal Asija<sup>a</sup>, Gabriele Kociok-Köhn<sup>b</sup>, Kieran C. Molloy<sup>b</sup> and Pavletta Shestakova<sup>c</sup>

### Material and Methods

The compound,  $[n\text{-Bu}_2\text{Sn}(\text{O}_2\text{P}(\text{OMe})\text{Me})_2]_n$  (**1**) was synthesized by following a procedure as reported earlier.<sup>R</sup> The multinuclear [<sup>1</sup>H, <sup>13</sup>C{<sup>1</sup>H}, <sup>31</sup>P{<sup>1</sup>H}, <sup>119</sup>Sn{<sup>1</sup>H}] NMR spectra were recorded on BRUKER DPX-300 spectrometer at 300, 75.47, 121.50 and 111.88 MHz, respectively. The <sup>1</sup>H and <sup>13</sup>C NMR chemical shifts are quoted with respect to the residual protons of CDCl<sub>3</sub> while the <sup>119</sup>Sn and <sup>31</sup>P NMR data are referenced to Me<sub>4</sub>Sn and 85% H<sub>3</sub>PO<sub>4</sub> respectively. The solid state NMR spectrum was recorded on a Bruker Avance II+ 600 NMR spectrometer operating at 600.11 MHz proton frequency (223.67 MHz for <sup>119</sup>Sn), using 4 mm solid state CP/MAS dual probe head. The samples were loaded in 4 mm zirconia rotors and spun at magic angle spinning (MAS) rates of 14 and 11 kHz to identify the isotropic chemical shift values. NMR spectra was measured with one-pulse sequence, 16K time domain data points, spectrum width of 2000 ppm, 6000 scans and a recycle delay of 5s. The spectrum was referenced with respect to Me<sub>4</sub>Sn as well as SnCl<sub>4</sub> as a secondary reference (isotropic chemical shift -145 ppm). The IR spectra were recorded on Nicolet protege 460 E.S.P. spectrophotometer using KBr optics. The UV-Vis spectra were recorded on a Perkin-Elmer (Lambda Bio 20) spectrophotometer. Scanning electron microscope (SEM) EVO-50 from CARL Zeiss AG, Germany was used to take images of the spin coated samples on a glass surface. Tapping-mode atomic force microscopy (AFM) was carried out on Bruker Dimension icon AFM instrument. The images of the spin coated samples on glass surface

were acquired in air using MPP-11100-10 probe. The Bruker tip radius and resonance frequency are 8nm and 75 kHz, respectively. Energy-dispersive X-ray spectroscopy of the samples was performed on Rontac instrument. Spin coated sample on glass surface was analyzed for EDX studies. Optical Microscopy (OM) was carried out on Zeta 20. Images were captured at 10X and 20X zoom.

### **Spectroscopic characterization of the micro crystallites of 1**

$^1\text{H}$  NMR ( $\text{CDCl}_3$ ):  $\delta$  3.53 (d,  $^3J_{\text{P-H}} = 11.1$  Hz, 6H, P-O- $\text{CH}_3$ ), 1.69-1.58 (br, 4H, Sn $\text{CH}_2$ ), 1.45-1.42 (m, 4H, Sn $\text{CH}_2\text{CH}_2$ ), 1.31-1.21 (m, 10H, Sn( $\text{CH}_2$ ) $_2\text{CH}_2$  + P $\text{CH}_3$ ), 0.84 (t,  $^3J_{\text{H-H}} = 7.5$  Hz, 6H, Sn( $\text{CH}_2$ ) $_3\text{CH}_3$ ).  $^{13}\text{C}\{^1\text{H}\}$  NMR ( $\text{CDCl}_3$ ):  $\delta$  51.8 (d,  $^2J_{\text{P-C}} = 7.5$  Hz, P-O- $\text{CH}_3$ ), 32.0 (s,  $^1J_{\text{Sn-C}} = 1042$  Hz, Sn $\text{CH}_2$ ), 26.6 (s,  $^2J_{\text{Sn-C}} = 147.8$  Hz, Sn $\text{CH}_2\text{CH}_2$ ), 27.5 (s,  $^3J_{\text{Sn-C}} = 40.7$  Hz, Sn( $\text{CH}_2$ ) $_2\text{CH}_2$ ), 13.8 (s, Sn( $\text{CH}_2$ ) $_3\text{CH}_3$ ), 11.4 (d,  $^1J_{\text{P-C}} = 143.2$  Hz).  $^{31}\text{P}\{^1\text{H}\}$  NMR ( $\text{CDCl}_3$ ):  $\delta$  23.0.  $^{119}\text{Sn}\{^1\text{H}\}$  NMR ( $\text{CDCl}_3$ ):  $\delta$  -398. IR (KBr,  $\text{cm}^{-1}$ ): 1056 ( $\nu_{\text{P-O}}$ ), 1157 ( $\nu_{\text{C-O}}$ ), 514 ( $\nu_{\text{Sn-C}}$ ).  
Anal. Calcd for  $\text{C}_{12}\text{H}_{30}\text{O}_6\text{P}_2\text{Sn}$  (452.05): C, 31.96; H, 6.70. Found: C, 31.90; H, 6.73.

Figure S1. Powder X-ray diffraction pattern of (a) simulated obtained from single crystals (b) micro crystallites of 1.

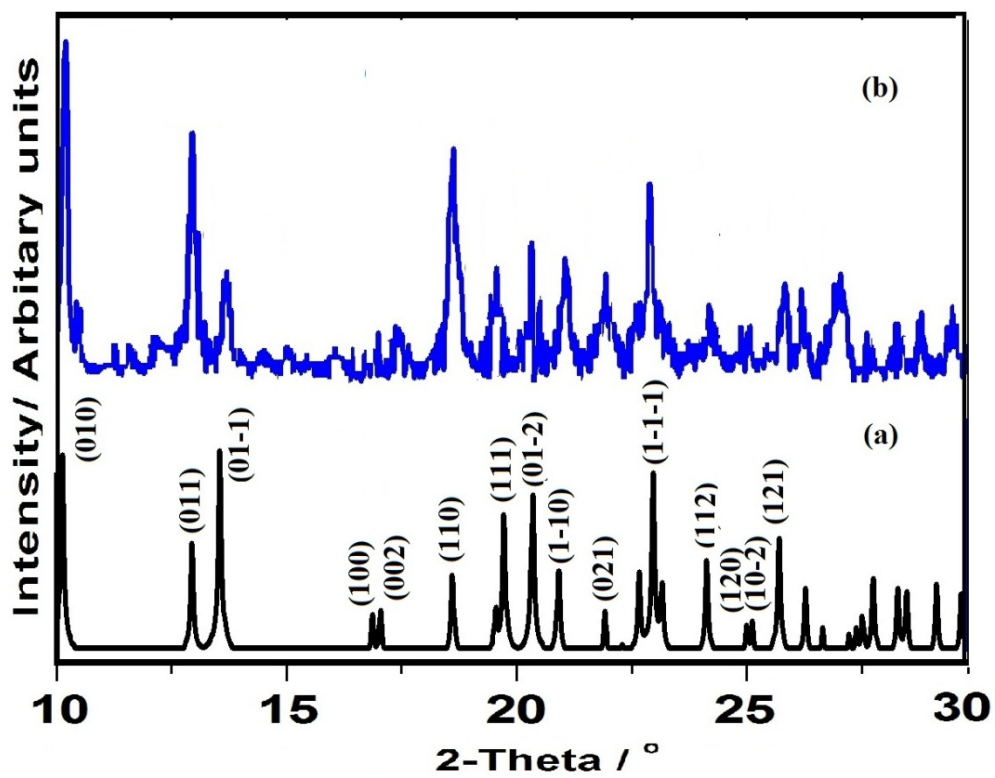

Figure S2.  $^{119}\text{Sn}$  solid state NMR spectra of 1 at 14 kHz and 11 kHz.

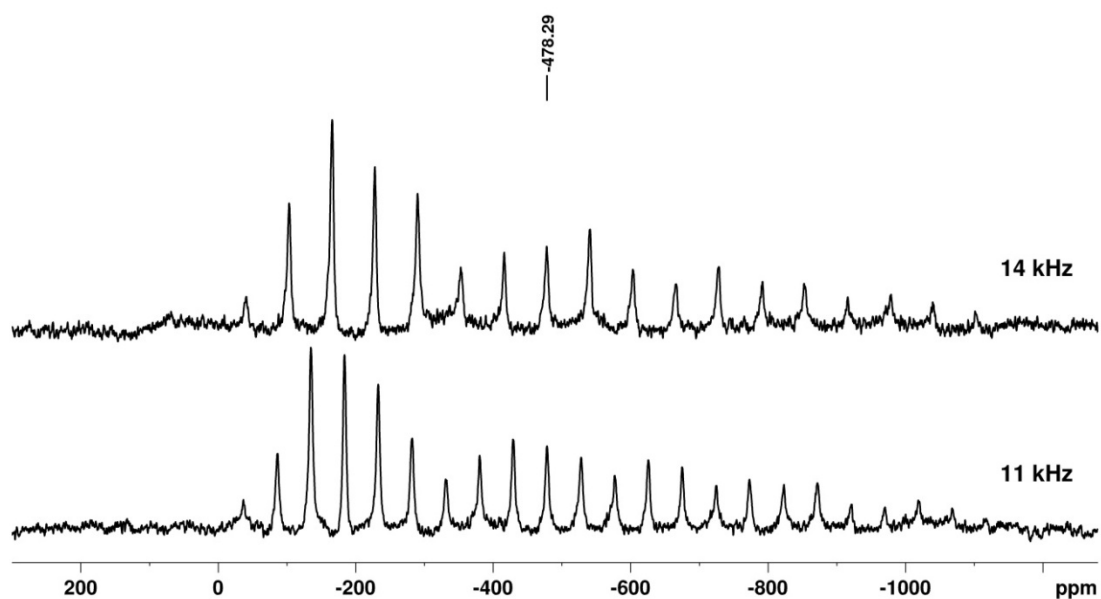

Figure S3. (a) AFM image of a growth solution of 1 in presence of iodine. (b) Depth histogram.

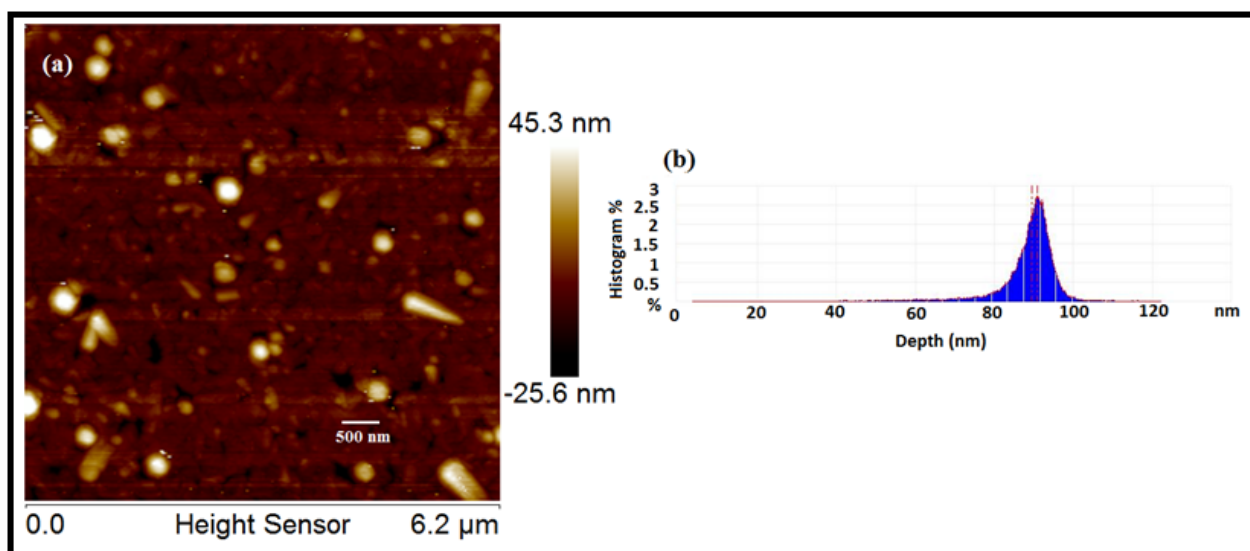

It is important to mention the AFM image often does not provide a proper resolution of the image in  $x$  and  $y$  axes.<sup>5</sup> This difference is evident upon comparing the results with SEM micrographs.

**Figure S4. EDX data of the colloidal particles obtained from growth solution of 1 in presence of iodine**

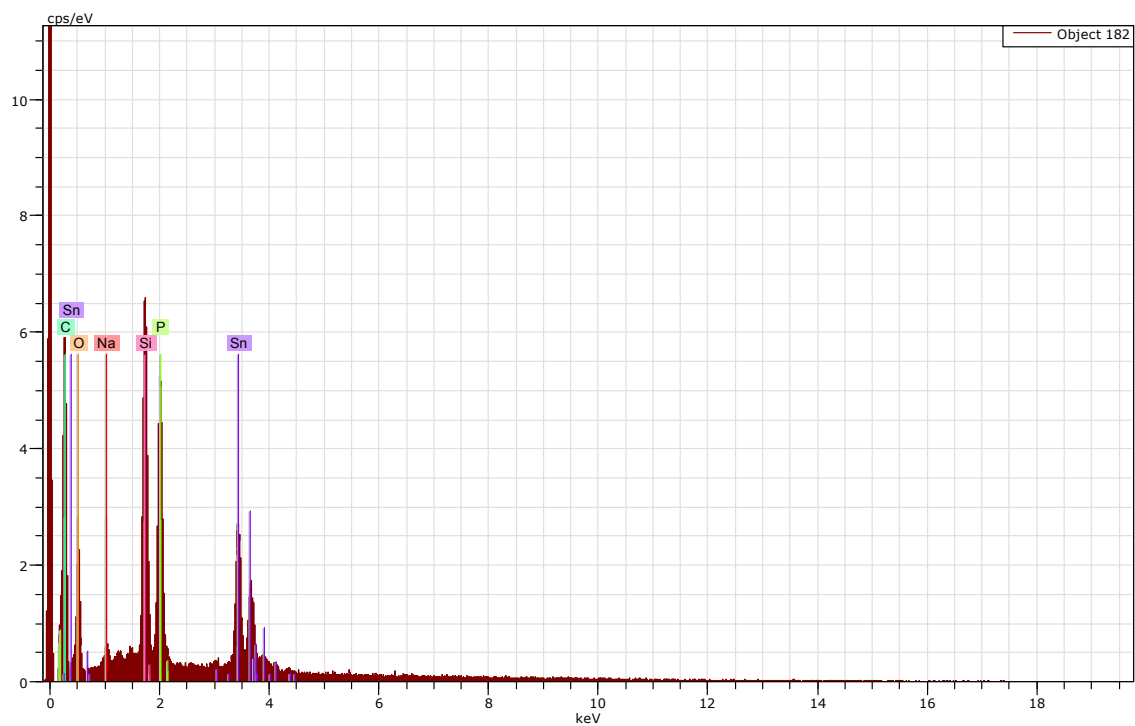

| El     | AN | Series   | unn. C<br>[wt.%] | norm. C<br>[wt.%] | Atom. C<br>[at.%] | Error<br>[%] |
|--------|----|----------|------------------|-------------------|-------------------|--------------|
| O      | 8  | K-series | 37.54            | 40.77             | 48.95             | 8.4          |
| C      | 6  | K-series | 21.06            | 22.87             | 36.58             | 6.5          |
| Sn     | 50 | L-series | 17.57            | 19.08             | 3.09              | 0.6          |
| P      | 15 | K-series | 7.98             | 8.66              | 5.37              | 0.4          |
| Si     | 14 | K-series | 7.24             | 7.86              | 5.38              | 0.4          |
| Na     | 11 | K-series | 0.69             | 0.75              | 0.63              | 0.1          |
| Total: |    |          | 92.09            | 100.00            | 100.00            |              |

## **X-ray crystal structure of 1**

The intensity data of **1** was collected on Nonius Kappa CCD diffractometer equipped with molybdenum sealed tube and highly oriented graphite monochromator at 150(2) K by  $\omega$ ,  $\phi$  and  $2\theta$ -rotation at 10s per frame. Cell parameters, data reduction and absorption corrections were performed with Nonius software (*DENZO* and *SCALEPACK*).<sup>1</sup> The structure was solved by direct methods using *SIR-97*<sup>2</sup> and refined by full matrix least-square method on  $F^2$  using *SHELXL-2013*.<sup>3</sup> All calculations and graphics were performed using *WinGx*.<sup>4</sup> All the non-hydrogen atoms were refined anisotropically. Hydrogen atoms were placed in geometrically calculated positions by using a riding model. Images were created with the Diamond program.

**Table S1.** Summary of crystallographic data

| Crystal data                                 | 1                                                                   |
|----------------------------------------------|---------------------------------------------------------------------|
| Empirical formula                            | C <sub>12</sub> H <sub>30</sub> O <sub>6</sub> P <sub>2</sub> Sn    |
| Fw                                           | 450.99                                                              |
| $\lambda$ , Å                                | 0.71073                                                             |
| Crystal system                               | Triclinic                                                           |
| Space group                                  | P -1                                                                |
| a, Å                                         | 5.2504(4)                                                           |
| b, Å                                         | 8.6355(7)                                                           |
| c, Å                                         | 10.3202(8)                                                          |
| $\alpha$ , deg.                              | 86.763(5)                                                           |
| $\beta$ , deg.                               | 85.077(5)                                                           |
| $\gamma$ , deg.                              | 82.392(4)                                                           |
| V, Å <sup>3</sup>                            | 461.60(6)                                                           |
| Z                                            | 1                                                                   |
| $\rho_{\text{calcd}}$ , Mg m <sup>-3</sup>   | 1.622                                                               |
| $\mu$ (mm <sup>-1</sup> )                    | 1.577                                                               |
| F(000)                                       | 230                                                                 |
| Crystal size (mm)                            | 0.60 x 0.30 x 0.20                                                  |
| $\theta$ (°)                                 | 3.968 to 30.013                                                     |
| Limiting indices                             | -7 $\leq$ h $\leq$ 7, -12 $\leq$ k $\leq$ 11, -3 $\leq$ l $\leq$ 14 |
| Reflections collected                        | 8779                                                                |
| Independent reflections                      | 2603                                                                |
| Data completeness                            | 0.981                                                               |
| Max. and Min. transmission                   | 0.745 and 0.553                                                     |
| R(int)                                       | 0.0848                                                              |
| Goodness-of-fit on F <sup>2</sup>            | 1.036                                                               |
| Data/restraints/parameters                   | 2603 / 0 / 100                                                      |
| Final R indices (I $>$ 2 $\sigma$ (I))       | R $\sim$ 1 = 0.0410, wR $\sim$ 2 = 0.0782                           |
| R indices (all data)                         | R $\sim$ 1 = 0.0612, wR $\sim$ 2 = 0.0844                           |
| Largest diff. peak and hole eÅ <sup>-3</sup> | 0.659 and -1.982                                                    |

**Table S2. Selected Bond lengths (Å) and Bond angles (deg) for *n*-Bu<sub>2</sub>Sn{OP(O)(OMe)Me}<sub>2</sub> (1)**

---

|                                          |            |                            |            |
|------------------------------------------|------------|----------------------------|------------|
| Sn-C(3)                                  | 2.136(3)   | Sn-O(1)                    | 2.201(2)   |
| Sn-O(3) <sup>ii</sup>                    | 2.204(2)   | P-O(3)                     | 1.499(2)   |
| P-O(1)                                   | 1.500(2)   | P-O(2)                     | 1.589(2)   |
| P-C(1)                                   | 1.779(3)   | O(2)-C(2)                  | 1.441(4)   |
| <br>                                     |            |                            |            |
| C(3)-Sn-C(3) <sup>i</sup>                | 180.00(13) | O(1)-Sn-O(3) <sup>ii</sup> | 89.33(8)   |
| O(1) <sup>i</sup> -Sn-O(3) <sup>ii</sup> | 90.67(8)   | O(3)-P-O(1)                | 117.48(13) |
| O(3)-P-O(2)                              | 104.34(12) | O(1)-P-O(2)                | 110.43(12) |
| O(3)-P-C(1)                              | 110.55(15) | O(1)-P-C(1)                | 107.55(15) |
| O(2)-P-C(1)                              | 105.93(15) |                            |            |

---



Symmetry transformations used to generate equivalent atoms: (i)  $-x, -y+2, -z$  (ii)  $x-1, y, z$   
(iii)  $-x+1, -y+2, -z$  (iv)  $x+1, y, z$

Figure S5. 1D structure of  $n\text{-Bu}_2\text{Sn}\{\text{OP}(\text{O})(\text{OMe})\text{Me}\}_2$  (1) viewed along  $b$ -axis.

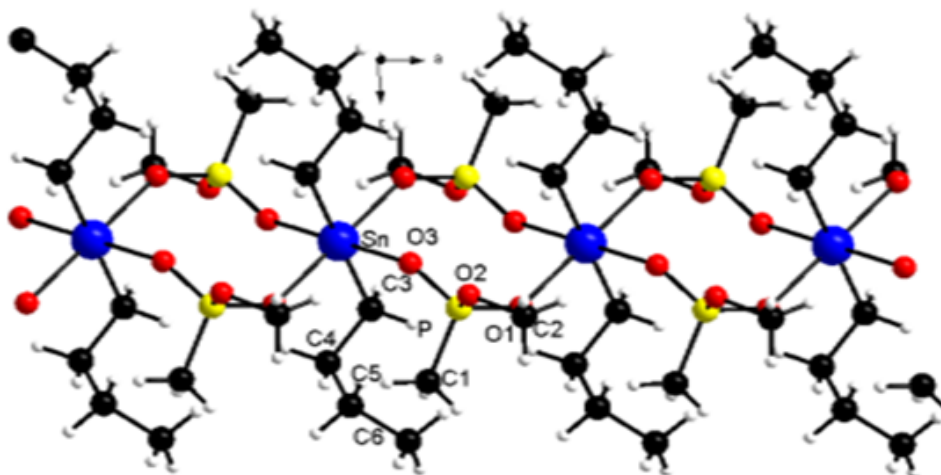

## References

1. *HKL DENZO* and *SCALEPACK* v1.96: Otwinowski, Z.; Minor, W. *Processing of X-ray Diffraction Data Collected in Oscillation Mode; Methods in Enzymology, Vol. 276: Macromolecular Crystallography, Part A.*; Carter, C.W., Jr., Sweet, R.M., Eds.; Academic Press: San Diego, CA, 1997; p 307.
2. A. Altomare, M. C. Burla, M. Carnalli, G. Cascarano, C. Giacovazzo, A. Guagliardi, A. G. G. Moliterni, G. Polidori, R. Spagan, *J. Appl. Cryst.*, 1999, **32**, 115.
3. G. M. Sheldrick, *Acta Cryst.*, 2008, **A64**, 112.

4. L. J. Farrugia, *J. Appl. Cryst.*, 1999, **32**, 837.
5. R. M.-Balleste, J. G.-Herrero and F. Zamora, *Chem. Soc. Rev.*, 2010, **39**, 4220.
